# Supplementary material
Source: PubMed Central journal article supplement (PMC2646893)
Supplement: NIHMS91434-supplement-1_si_001.pdf [file NIHMS91434-supplement-1_si_001.pdf]

# Aza- and Oxadithiolates are Proton Relays in Functional Models for the [FeFe]-Hydrogenases

Bryan E. Barton, Matthew T. Olsen, and Thomas B. Rauchfuss\*  
School of Chemical Sciences, University of Illinois, Urbana, IL 61801

## Supporting Information

### 1) Experimental Procedures

### 2) Supporting Figures

- Figure S1. High-field  $^1\text{H}$  NMR spectra of  $[\mathbf{3}(t\text{-H})]\text{BAr}^{\text{F}_4}$  and  $[\mathbf{3}(\mu\text{-H})]\text{BAr}^{\text{F}_4}$ .
- Figure S2. FT-IR spectra of  $\mathbf{3}$  and  $[\mathbf{3}(t\text{-H})]\text{BF}_4$ .
- Figure S3.  $^{31}\text{P}$  NMR spectra of  $[\mathbf{2}(t\text{-H})]\text{BAr}^{\text{F}_4}$  and  $[\mathbf{3}(t\text{-H})]\text{BAr}^{\text{F}_4}$  before and after addition of  $\text{NEt}_3$ .
- Figure S4.  $^{31}\text{P}$  NMR spectra of  $[\mathbf{3}(t\text{-H})]\text{BAr}^{\text{F}_4}$  after addition of various bases
- Figure S5.  $^{31}\text{P}$  NMR spectra of  $[\mathbf{2}(t\text{-H})]\text{BAr}^{\text{F}_4}$  before and after addition of  $\text{PMe}_2\text{Ph}$  and  $\text{PBu}_3$ .
- Figure S6.  $^1\text{H}$  NMR spectra of  $[\mathbf{1}(t\text{-H})]\text{BAr}^{\text{F}_4}$  with large excess of  $\text{NEt}_3$ .
- Figure S7.  $^1\text{H}$  NMR spectra of  $[\mathbf{1}(\mu\text{-H})]\text{BAr}^{\text{F}_4}$ ,  $[\mathbf{2}(\mu\text{-H})]\text{BAr}^{\text{F}_4}$ , and  $[\mathbf{3}(\mu\text{-H})]\text{BAr}^{\text{F}_4}$  upon treatment with  $\text{NEt}_3$ .
- Figure S8.  $^{31}\text{P}$  NMR spectra of  $\mathbf{2}$  before and after addition of  $[\text{HPPH}_3]\text{BAr}^{\text{F}_4}$ .
- Figure S9.  $^{31}\text{P}$  NMR spectra of  $[\mathbf{1}(t\text{-H})]\text{BAr}^{\text{F}_4}$  at  $-80\text{ }^\circ\text{C}$ .
- Figure S10.  $^{31}\text{P}$  NMR spectra for the protonation of  $\mathbf{3}$ .
- Figure S11. FT-IR spectra of  $[\mathbf{2H}]\text{BAr}^{\text{F}_4}$  at  $-40\text{ }^\circ\text{C}$ , in  $\text{CH}_2\text{Cl}_2$  and separately in  $\text{MeOH}$  solutions.
- Figure S12. FT-IR spectra of  $[\mathbf{2}(t\text{-H})]\text{BAr}^{\text{F}_4}$  at  $-40\text{ }^\circ\text{C}$  titrated with  $[\text{NBu}_4][\text{BF}_4]$ .
- Figure S13. Cyclic voltammograms of  $[\mathbf{2}(t\text{-H})]\text{BAr}^{\text{F}_4}$  and  $[\mathbf{3}(t\text{-H})]\text{BAr}^{\text{F}_4}$  with  $[\text{HPMe}_2\text{Ph}]\text{BF}_4$  and  $\text{HBF}_4\cdot\text{Et}_2\text{O}$ , respectively.
- Figure S14. Plots of  $[\text{H}^+]$  and  $[\text{H}^+]^{1/2}$  vs  $i_c/i_p$  for  $[\mathbf{2}(t\text{-H})]\text{BF}_4$ .
- Figure S15. Plots of  $[\text{H}^+]$  and  $[\text{H}^+]^{1/2}$  vs  $i_c/i_p$  for  $[\mathbf{1}(t\text{-H})]\text{BF}_4$  and  $[\mathbf{3}(t\text{-H})]\text{BF}_4$ .
- Figure S16. Kinetics of isomerization of  $[\mathbf{3}(t\text{-H})]\text{BAr}^{\text{F}_4}$  to  $[\mathbf{3}(\mu\text{-H})]\text{BAr}^{\text{F}_4}$ .

### 3) Supporting Information References

## 1.) Experimental Procedures

Manipulations were conducted using standard Schlenk techniques. Solvents were filtered through activated alumina and subsequently degassed.  $^1\text{H}$  and  $^{31}\text{P}$  NMR spectra were acquired on a Unity Varian 500 or a Unity Varian 600 spectrometer. IR spectra were collected on a Mattson Infinity Gold FTIR spectrometer. *Cis*-1,2-bis(diphenylphosphino)ethylene (dppv) and  $\text{HBF}_4\cdot\text{Et}_2\text{O}$  solution were purchased from Aldrich.  $\text{Fe}_2(\text{S}_2\text{C}_3\text{H}_6)(\text{CO})_2(\text{dppv})_2$  (**1**),<sup>1</sup>  $\text{Fe}_2[\text{S}_2(\text{CH}_2)_2\text{NH}](\text{CO})_2(\text{dppv})_2$  (**2**),<sup>1</sup>  $\text{Fe}_2(\text{S}_2\text{C}_2\text{H}_4\text{O})(\text{CO})_6$  (**3**),<sup>2</sup> and  $[\text{H}(\text{Et}_2\text{O})_2]\text{BAR}^{\text{F}_4}$ <sup>3</sup> were prepared according to literature procedures ( $\text{BAR}^{\text{F}_4} = \text{B}(\text{C}_6\text{H}_3\text{-3,5-(CF}_3)_2)_4$ ).

**$\text{Fe}_2[(\text{SCH}_2)_2\text{O}](\text{CO})_4(\text{dppv})$** . To a solution of 0.518 g (1.34 mmol)  $\text{Fe}_2(\text{S}_2\text{C}_2\text{H}_4\text{O})(\text{CO})_6$  and 0.549 g (1.38 mmol) of dppv in 20 mL of MeCN was added 0.100 g (0.133 mmol) of  $\text{Me}_3\text{NO}$  in 5 mL of MeCN. The solution immediately darkened and over several hours thickened with a brown precipitate. Solvent was removed in vacuo, the solid was dissolved in 5 mL of  $\text{CH}_2\text{Cl}_2$ , and precipitated by addition of 40 mL of hexane. This process was repeated twice to give a fluffy golden powder of the crude compound that was sufficiently pure for the next step. Yield: 0.878 g (90%).  $^1\text{H}$  NMR (200 MHz,  $\text{CD}_2\text{Cl}_2$ , 20 °C):  $\delta$  ~8.0 (m, 4H,  $\text{C}_2\text{H}_2$ ), ~7.5 – 7.2 (m, 20H,  $\text{C}_2\text{H}_2\text{P}$ ), 3.86 (d,  $\text{SCH}_2$ ,  $J_{\text{H,H}} = 9.6$  Hz), 3.37 (d,  $\text{SCH}_2$ ,  $J_{\text{H,H}} = 8.4$  Hz).  $^{31}\text{P}$  NMR (200 MHz,  $\text{CD}_2\text{Cl}_2$ , 20 °C):  $\delta$  96.9 (s, dppv), 83.6 (s, dppv). FT-IR ( $\text{CH}_2\text{Cl}_2$ ):  $\nu_{\text{CO}} = 2026, 1955, 1918$   $\text{cm}^{-1}$ . FD-MS:  $m/z = 728.0$  ( $[\text{Fe}_2[(\text{SCH}_2)_2\text{O}](\text{CO})_4(\text{dppv})]^+$ ).

**$\text{Fe}_2[(\text{SCH}_2)_2\text{O}](\text{CO})_2(\text{dppv})_2$ , (**3**)**. A solution of 0.266 g of  $\text{Fe}_2[(\text{SCH}_2)_2\text{O}](\text{CO})_4(\text{dppv})$  (0.37 mmol) and 0.160 g of dppv (0.40 mmol) in 75 mL of toluene was photolyzed with a 100 W UV immersion lamp,  $\lambda_{\text{max}} = 356$  nm (Spectroline), until the IR spectrum showed complete consumption of the starting material (~20 hours). The solution was dried in vacuo, redissolved in 5 mL of  $\text{CH}_2\text{Cl}_2$  and precipitated upon addition of 40 mL of hexanes. This process was repeated twice or until the filtrate was clear, yielding a dark green powder. Yield: 0.201g (51.5%).  $^1\text{H}$  NMR (500 MHz,  $\text{CD}_2\text{Cl}_2$ , 20 °C):  $\delta$  8.02 (m, 4H,  $\text{C}_2\text{H}_2\text{P}$ ), 7.9 – 7.1 (m, 40H,  $\text{C}_2\text{H}_2\text{P}$ ), 2.86 (2,  $(\text{SCH}_2)_2\text{O}$ , 4H).  $^{31}\text{P}\{^1\text{H}\}$  NMR (202 MHz,  $\text{CD}_2\text{Cl}_2$ , 20 °C):  $\delta$  91.6 (s). IR ( $\text{CH}_2\text{Cl}_2$ ):  $\nu_{\text{CO}} = 1891, 1871$   $\text{cm}^{-1}$ . Anal. Calcd for  $\text{C}_{56}\text{H}_{48}\text{Fe}_2\text{O}_3\text{P}_4\text{S}_2$  (found): C, 62.94 (63.00); H, 4.53 (4.43).

**$[\text{HFe}_2[(\text{SCH}_2)_2\text{O}](\mu\text{-CO})(\text{dppv})_2]\text{BAR}^{\text{F}_4}$ , [**3H**] $\text{BAR}^{\text{F}_4}$** . In a J. Young NMR tube  $\text{CD}_2\text{Cl}_2$  was distilled onto  $\text{Fe}_2[(\text{SCH}_2)_2\text{O}](\text{CO})_2(\text{dppv})_2$  (7 mg, 0.007 mmol) and  $[\text{H}(\text{Et}_2\text{O})_2][\text{BAR}^{\text{F}_4}]$  (7 mg, 0.007 mmol). The J. Young tube was then placed directly into a -78 °C bath and analyzed with low temperature NMR spectroscopy. High field  $^1\text{H}$  NMR (600 MHz,  $\text{CD}_2\text{Cl}_2$ , -40 °C):  $\delta$  - 2.7 (t, Fe-H,  $^2J_{\text{PH}} = 72$  Hz).  $^{31}\text{P}\{^1\text{H}\}$  NMR (242 MHz,  $\text{CD}_2\text{Cl}_2$ , -40 °C):  $\delta$  99 (s), 94 (s), 89 (s), 69 (s). After isomerization:  $^1\text{H}$  NMR (600 MHz,  $\text{CD}_2\text{Cl}_2$ , 25 °C):  $\delta$  - 14.5 (qd, Fe-H,  $J_{\text{PH}1,2,3} \sim 20$  Hz,  $J_{\text{PH}4} \sim 7$  Hz),  $\delta$  - 15.4 (tt, Fe-H,  $J_{\text{PH}1,2} \sim 20$  Hz,  $J_{\text{PH}3,4} \sim 7$  Hz).  $^{31}\text{P}\{^1\text{H}\}$  NMR (242 MHz,  $\text{CD}_2\text{Cl}_2$ , 25 °C):  $\delta$  89, 88; 86, 84, 83, 78.

**Isomerization of  $[3(t\text{-H})]^+$  to  $[3(\mu\text{-H})]^+$ .** In a J. Young NMR tube  $\text{CD}_2\text{Cl}_2$  (0.7 mL) was distilled onto **3** (7 mg, 0.007 mmol),  $[\text{H}(\text{Et}_2\text{O})_2]\text{BAr}^{\text{F}}_4$  (7 mg, 0.007 mmol), and hexamethylbenzene (0.5 mg, 0.005 mmol). The J. Young tube was then placed into a  $-40\text{ }^\circ\text{C}$  bath and analyzed with low temperature NMR spectroscopy. Data were collected as an array over 2 h showing nearly complete consumption of  $2\text{H}^+$  and growth of two isomers of  $2\mu^+$ . The terminal hydride triplet at  $\delta -2.7$  was integrated from each FID against the internal standard hexamethylbenzene. The isomerization of terminal hydride followed first order kinetics (see figure S15).

**Preparation of  $[\text{HPPh}_3]\text{BAr}^{\text{F}}_4$ .** A solution of  $[\text{H}(\text{Et}_2\text{O})_2][\text{BAr}^{\text{F}}_4]$  (0.385 g, 0.377 mmol) in  $\text{Et}_2\text{O}$  (10 mL) at  $-40\text{ }^\circ\text{C}$  was transferred via cannula into a solution of  $\text{PPh}_3$  (0.097 g, 0.370 mmol) in  $\text{Et}_2\text{O}$  (10 mL) at  $-40\text{ }^\circ\text{C}$ . Solvent was removed under vacuum, leaving a white solid. Yield: 0.350 g (83%).  $^{31}\text{P}\{^1\text{H}\}$  NMR (242 MHz,  $\text{CD}_2\text{Cl}_2$ ,  $20\text{ }^\circ\text{C}$ ):  $\delta$  7.0 (s).  $^1\text{H}$  NMR (600 MHz,  $\text{CD}_2\text{Cl}_2$ ,  $20\text{ }^\circ\text{C}$ ):  $\delta$  8.28 (d, 1H,  $[\text{HPPh}_3]^+$ ,  $J_{\text{PH}} = 498\text{ Hz}$ ), 7.6-8.0 (m, 15H,  $[\text{HPPh}_3]$ ), 7.55 (s, 4H, *p*-CH,  $[\text{BAr}^{\text{F}}_4]$ ), 7.73 (s, 8H, *o*-CH,  $[\text{BAr}^{\text{F}}_4]$ ).

**Electrochemistry.** Cyclic voltammetry experiments were carried out in a ca. 20-mL one-compartment glass cell. The working electrode was a glassy carbon disk (0.3 cm in diameter). The reference electrode for experiments conducted less than  $0\text{ }^\circ\text{C}$  was a pseudo-reference silver wire, for experiments  $> 0\text{ }^\circ\text{C}$ , a  $\text{Ag}/\text{AgCl}$  electrode (ca.  $-0.50\text{ V}$  vs  $\text{Fc}/\text{Fc}^+$ ) was employed. The counter electrode was a Pt wire. The electrolyte was 0.1 M  $\text{Bu}_4\text{NPF}_6$ . The concentration of the organometallic complex was 1 mM.

**Proton Reduction Catalysis Cyclic Voltammetry for  $[3(t\text{-H})]\text{BF}_4$ .** A at  $-40\text{ }^\circ\text{C}$  solution of **3** (7.5 mg, 0.007 mmol) in 6 mL  $\text{CH}_2\text{Cl}_2$  was treated with aliquots (10  $\mu\text{L}$ , 0.07 mmol) of a 0.691 M  $\text{HBF}_4\cdot\text{Et}_2\text{O}$  solution in  $\text{CH}_2\text{Cl}_2$ . Cyclic voltammograms were collected at 50 mV/s.

**Proton Reduction Catalysis Cyclic Voltammetry for  $[2(t\text{-H})]\text{BF}_4$ .** A  $-40\text{ }^\circ\text{C}$  solution of **2** (7.5 mg, 0.007 mmol) in 6 mL  $\text{CH}_2\text{Cl}_2$  was treated at  $-40\text{ }^\circ\text{C}$  with aliquots (100  $\mu\text{L}$ , 0.07 mmol) of a solution of 0.0691 M  $[\text{HPMe}_2\text{Ph}]\text{BF}_4$  in  $\text{CH}_2\text{Cl}_2$ . Cyclic voltammograms were recorded at 50 mV/s.

## 2) Supplemental Figures

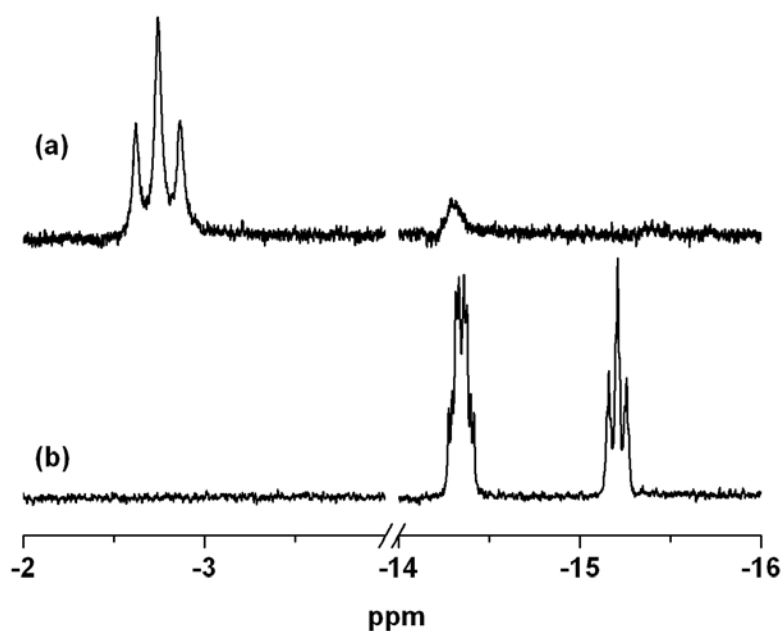

**Figure S1.**  $^1\text{H}$  NMR spectra of a  $\text{CD}_2\text{Cl}_2$  solution of **3** after protonation with  $[\text{H}(\text{Et}_2\text{O})_2]\text{BAr}^{\text{F}}_4$ .

- a: The kinetically-favored terminal hydride ( $-75\text{ }^\circ\text{C}$ , 600 MHz) showing  $[\mathbf{3}(t\text{-H})]\text{BAr}^{\text{F}}_4$  as well as a small amount of the first isomer of the bridging hydride ( $\delta$  -14.4)
- b: After isomerizing to  $[\mathbf{3}(\mu\text{-H})]\text{BAr}^{\text{F}}_4$  upon warming to  $25\text{ }^\circ\text{C}$  (recorded at 500 MHz). The bridging hydride exists as two predominant isomers at  $\delta$  - 14.5 (qd, Fe-H,  $J_{\text{PH}1,2,3} \sim 20\text{ Hz}$ ,  $J_{\text{PH}4} \sim 7\text{ Hz}$  for the asymmetric (apical,basal-dppv)(basal,basal-dppv) isomer) and at  $\delta$  - 15.4 (tt, Fe-H,  $J_{\text{PH}1,2} \sim 20\text{ Hz}$ ,  $J_{\text{PH}3,4} \sim 7\text{ Hz}$  for the dissymmetric (apical,basal-dppv)<sub>2</sub> isomer).

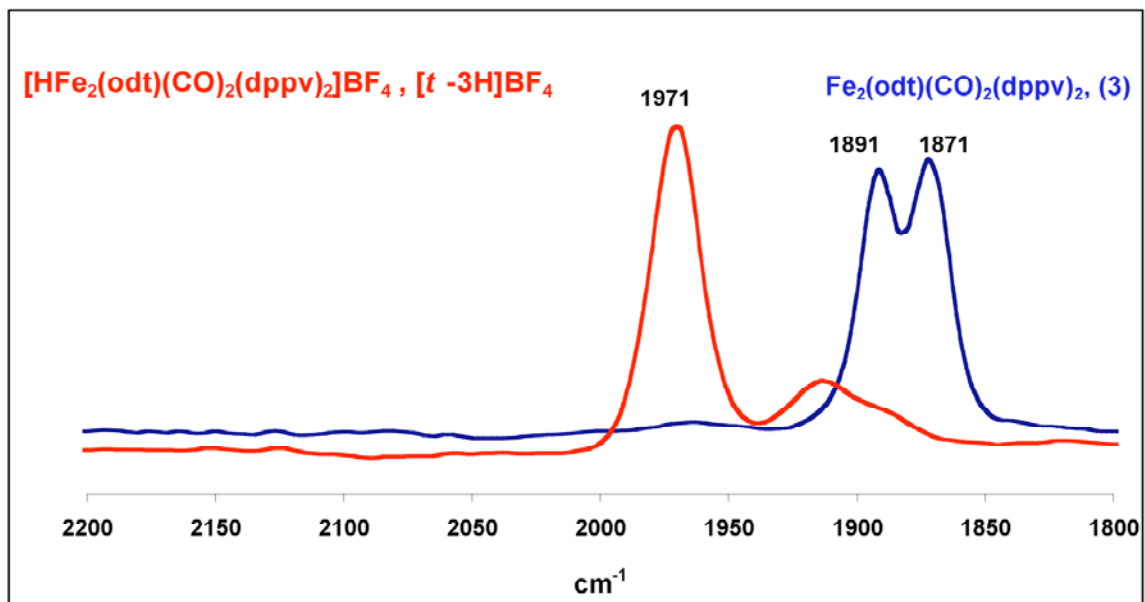

**Figure S2.** FT-IR spectra (-40 °C, CH<sub>2</sub>Cl<sub>2</sub>) of **3** (blue) and [3(*t*-H)]BF<sub>4</sub> (red).

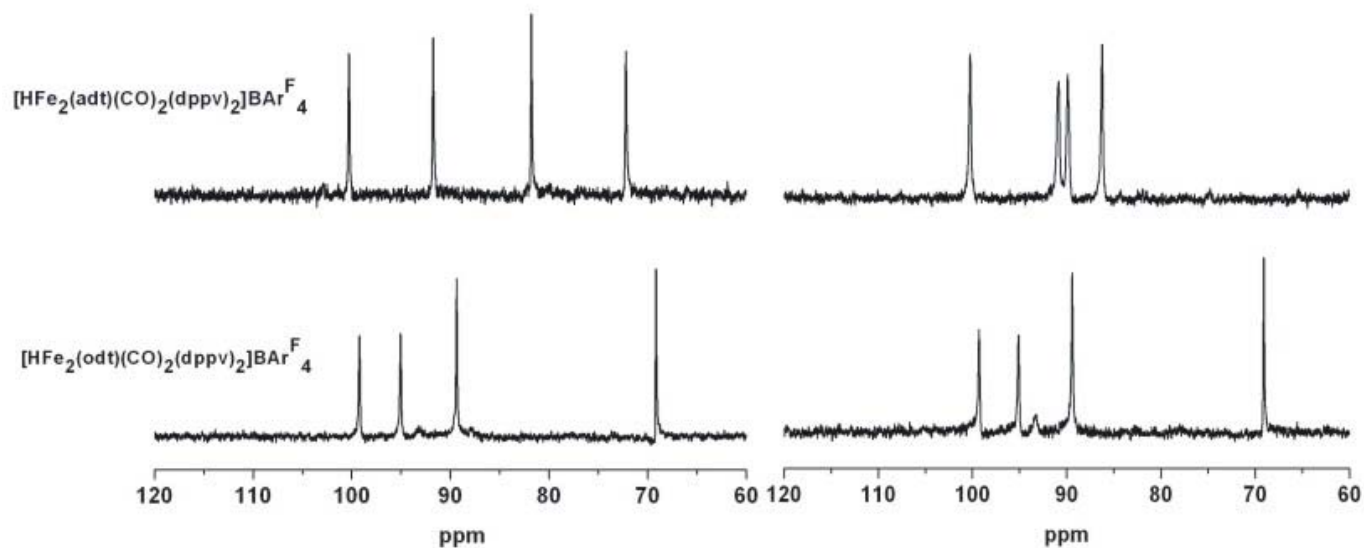

**Figure S3.**  $^{31}\text{P}\{^1\text{H}\}$  NMR (242 MHz,  $\text{CD}_2\text{Cl}_2$ ,  $-75^\circ\text{C}$ ) spectra before (left) and after (right) treatment of solutions ( $\text{CD}_2\text{Cl}_2$ ,  $-75^\circ\text{C}$ ) of  $[\mathbf{2}(t\text{-H})]\text{BARF}_4$  and  $[\mathbf{3}(t\text{-H})]\text{BARF}_4$  with  $\sim 100$  equiv of  $\text{Et}_3\text{N}$ . Upon addition of  $\text{NEt}_3$  to  $[\mathbf{2}(t\text{-H})]\text{BARF}_4$ , resulting  $^{31}\text{P}$  NMR (upper left) shows complete conversion to **2**, whereas for  $[\mathbf{3}(t\text{-H})]\text{BARF}_4$ , no change (lower left) is seen until warming near  $0^\circ\text{C}$  (see Figure S4).

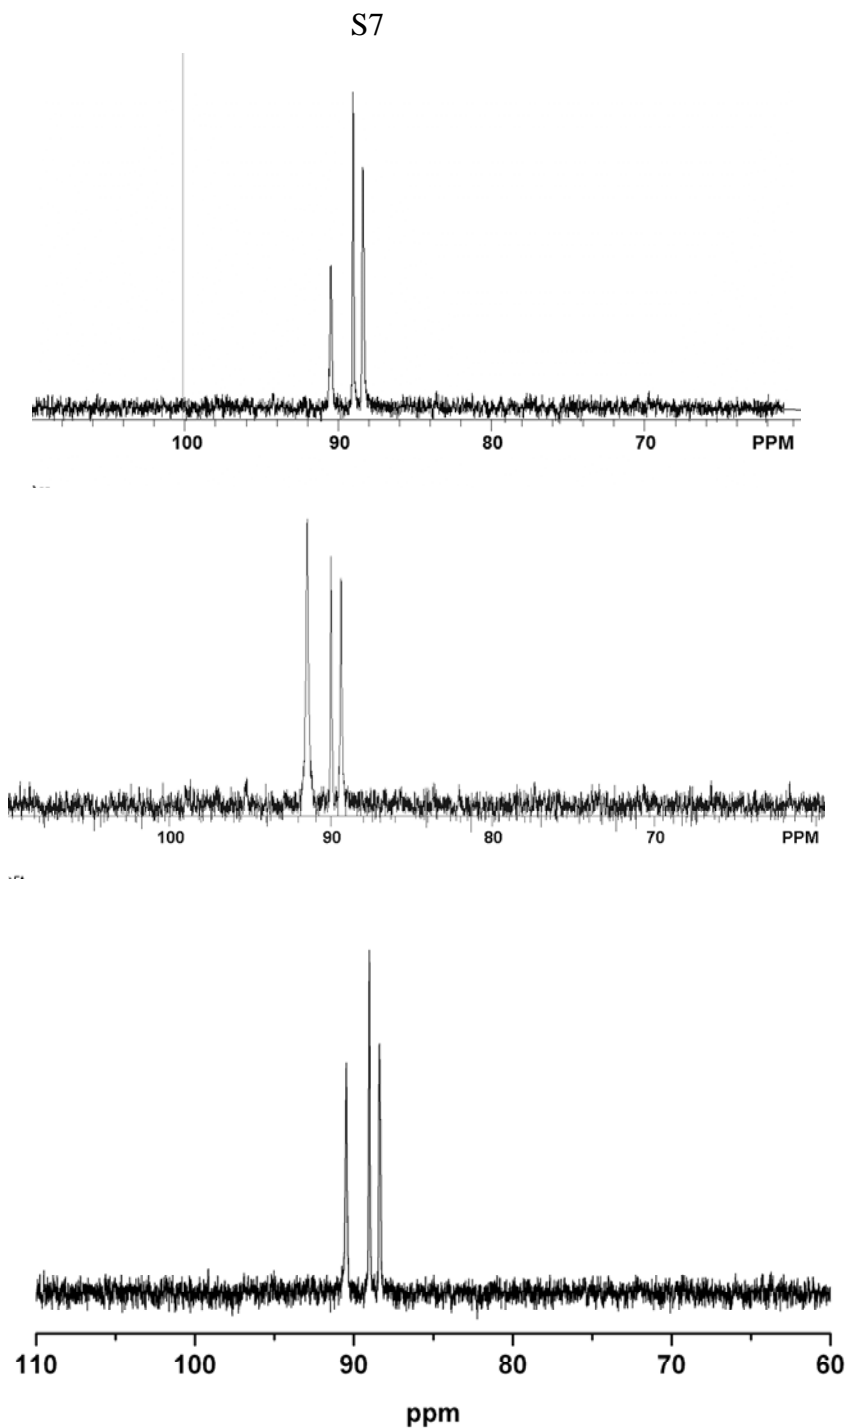

**Figure S4.**  $^{31}\text{P}\{^1\text{H}\}$  NMR (242 MHz,  $\text{CD}_2\text{Cl}_2$ ) spectra of solutions of  $[\mathbf{3}(t\text{-H})]\text{BAR}_4^{\text{F}}$  treated with various bases (see below) at  $-97\text{ }^\circ\text{C}$ , followed by warming to  $20\text{ }^\circ\text{C}$ , at which temperature the spectrum was recorded:

*top:*  $\sim 1$  equiv of tetramethylguanidine,

*middle:*  $\sim 1$  equiv of  $\text{PPh}_3$ ,

*bottom:*  $>100$  equiv  $\text{NEt}_3$ .

The spectra show about 50% conversion to  $\mathbf{3}$  ( $\delta$  90) and about 50% conversion to  $[\mathbf{3}(\mu\text{-H})]\text{BAR}_4^{\text{F}}$  (single isomer,  $\delta$  89, 88), regardless of the strength and amount of base.

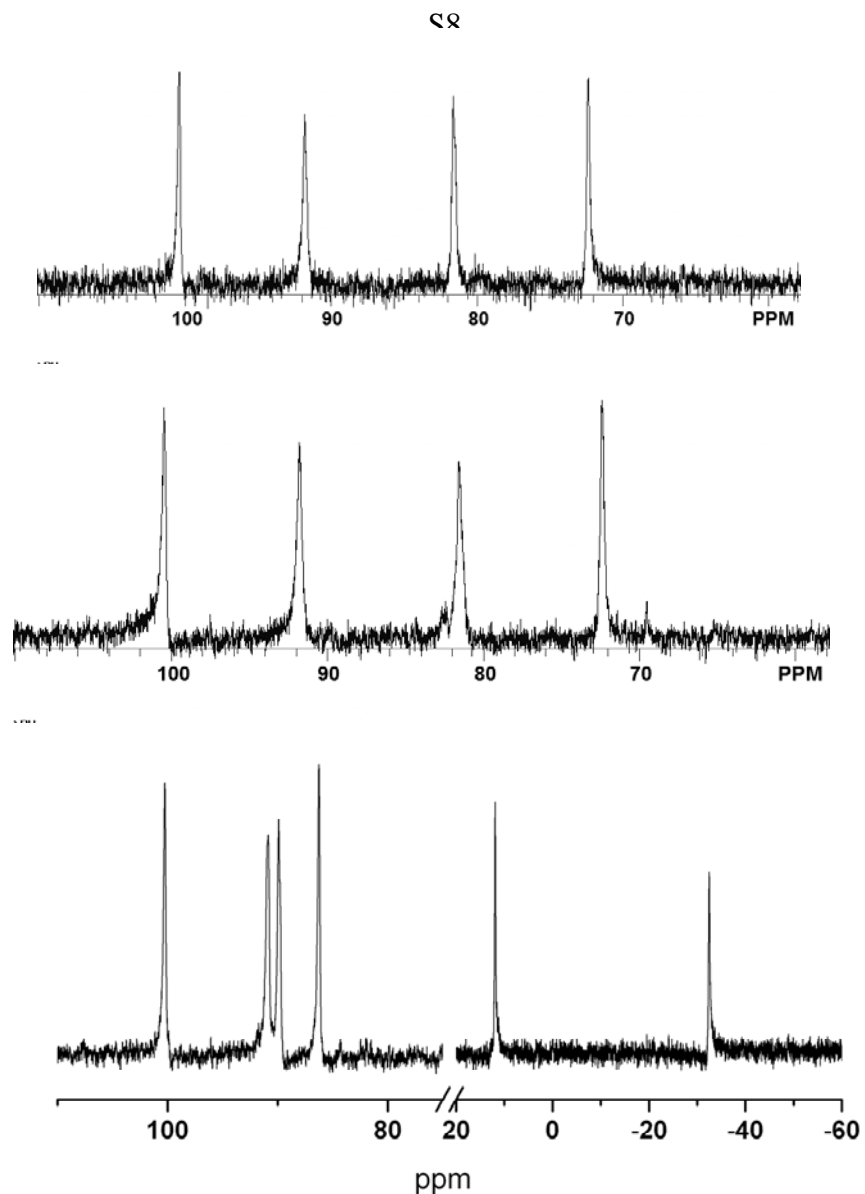

**Figure S5.**  $^{31}\text{P}\{^1\text{H}\}$  NMR (242 MHz,  $\text{CD}_2\text{Cl}_2$ ,  $-60\text{ }^\circ\text{C}$ ) spectra of  $[\mathbf{2}(t\text{-H})]\text{BAR}^{\text{F}_4}$   
*top:* before, and  
*middle:* after treatment with  $\sim 1$  equiv of  $\text{PMe}_2\text{Ph}$  (showing no reaction), then repeated by  
*bottom:* treatment with  $\sim 1$  equiv of  $\text{PBU}_3$  showing complete conversion to  $\mathbf{2}$  and some  $[\text{HPBu}_3]\text{BAR}^{\text{F}_4}$  at  $\delta$  11 and  $\text{PBU}_3$  at  $\delta$  -33. Additions were conducted at  $-60\text{ }^\circ\text{C}$ . In related experiments,  $\text{CD}_2\text{Cl}_2$  ( $-80\text{ }^\circ\text{C}$ ) solutions of  $\mathbf{1}$  and  $\mathbf{3}$  were treated with  $[\text{H}(\text{OEt}_2)_2]\text{BAR}^{\text{F}_4}$  (to give  $[\mathbf{3}(t\text{-H})]\text{BAR}^{\text{F}_4}$  and  $[\mathbf{1}(t\text{-H})]\text{BAR}^{\text{F}_4}$ , respectively) followed by treatment with  $\text{PPh}_3$ , and then warming to room temperature. The sample of  $[\mathbf{3}(t\text{-H})]\text{BAR}^{\text{F}_4}$  converted to a mixture of  $\mathbf{3}$  and  $[\mathbf{3}(\mu\text{-H})]\text{BAR}^{\text{F}_4}$  (two isomers). The sample of  $[\mathbf{3}(t\text{-H})]\text{BAR}^{\text{F}_4}$  converted to  $[\mathbf{1}(\mu\text{-H})]\text{BAR}^{\text{F}_4}$  (two isomers).



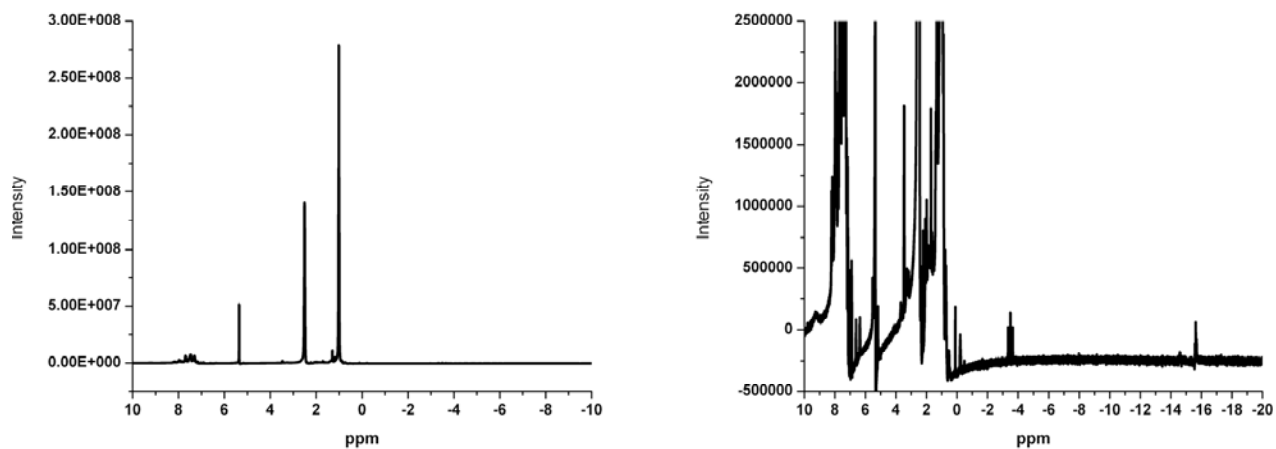

**Figure S6.**  $^1\text{H}$  NMR (500 MHz,  $\text{CD}_2\text{Cl}_2$ ) spectra (two views of the same spectrum) for solutions of  $[\mathbf{1}(t\text{-H})]\text{BArF}_4$ , generated at  $-35\text{ }^\circ\text{C}$ , treated at that same temperature with a large excess of  $\text{NEt}_3$  ( $\delta$  2.5, 1.0), followed by warming to  $20\text{ }^\circ\text{C}$ , whereupon the spectrum was recorded. The terminal hydride resonates at  $\delta$  -3.5 (triplet) and the bridging hydride isomers at  $\delta$  -14.5 and -15.7 (multiplets).

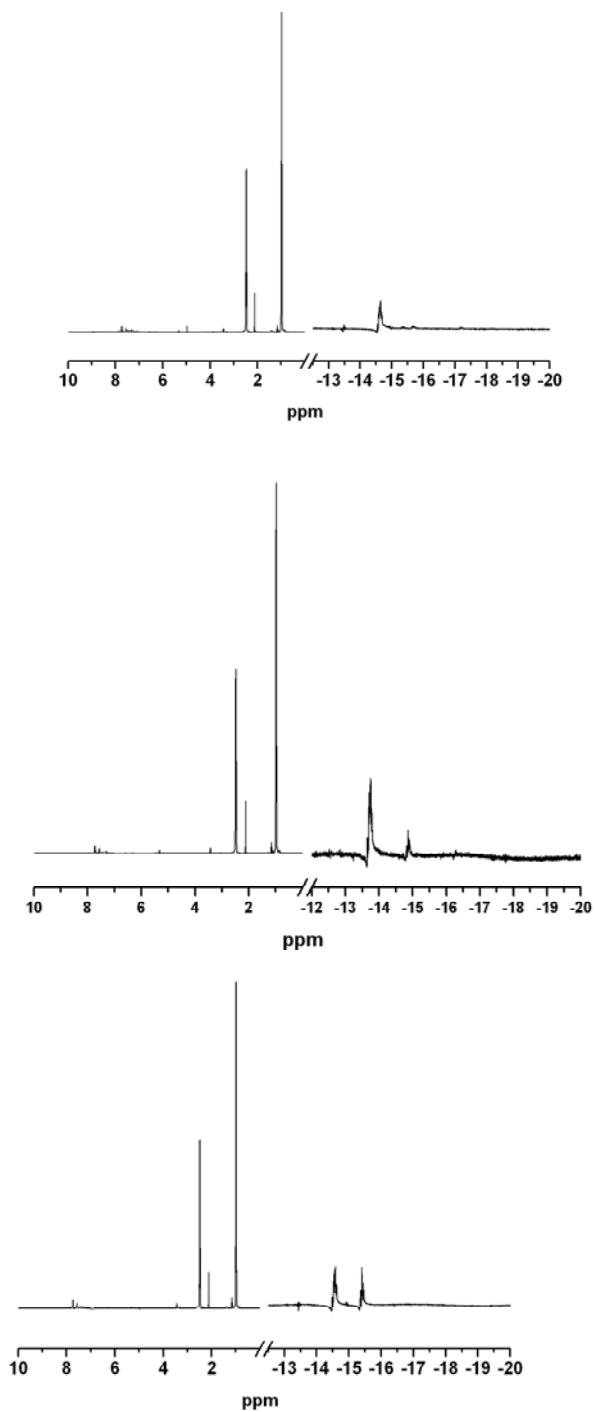

**Figure S7.**  $^1\text{H}$  NMR (500 MHz,  $\text{CD}_2\text{Cl}_2$ ) spectra of solutions of three  $\mu$ -hydride compounds after treatment with large excess of  $\text{NEt}_3$ , after equilibration for 24 h at 20  $^\circ\text{C}$ . The high-field region (right) was magnified by 500x.

*top spectrum:*  $[\mathbf{1}(\mu\text{-H})]\text{BAr}_4^{\text{F}}$ ,

*middle spectrum:*  $[\mathbf{2}(\mu\text{-H})]\text{BAr}_4^{\text{F}}$ ,

*bottom spectrum:*  $[\mathbf{3}(\mu\text{-H})]\text{BAr}_4^{\text{F}}$ .

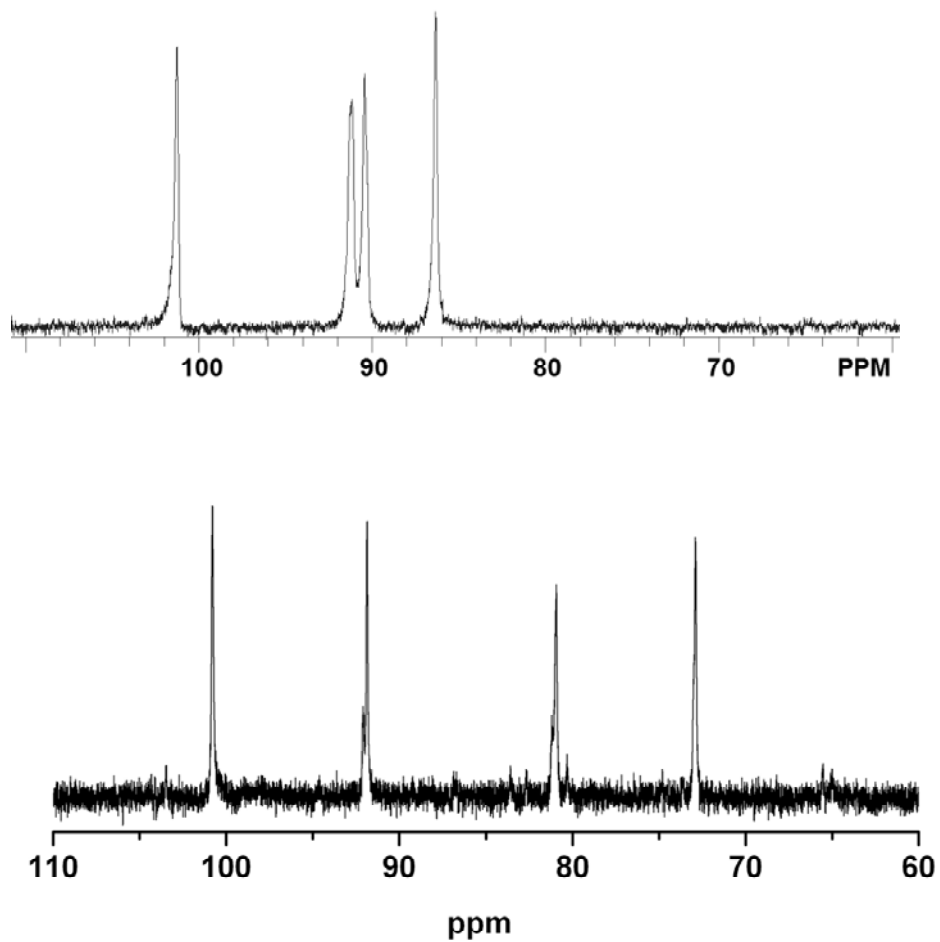

**Figure S8.**  $^{31}\text{P}\{^1\text{H}\}$  NMR (242 MHz,  $\text{CD}_2\text{Cl}_2$ ,  $-80\text{ }^\circ\text{C}$ ) spectra of solutions of **2** before (top spectrum) and after (bottom spectrum) treatment with  $\sim 1$  equiv of  $[\text{HPPh}_3]\text{BAr}^{\text{F}}_4$ , showing complete conversion to  $[\mathbf{2}(t\text{-H})]\text{BAr}^{\text{F}}_4$ .

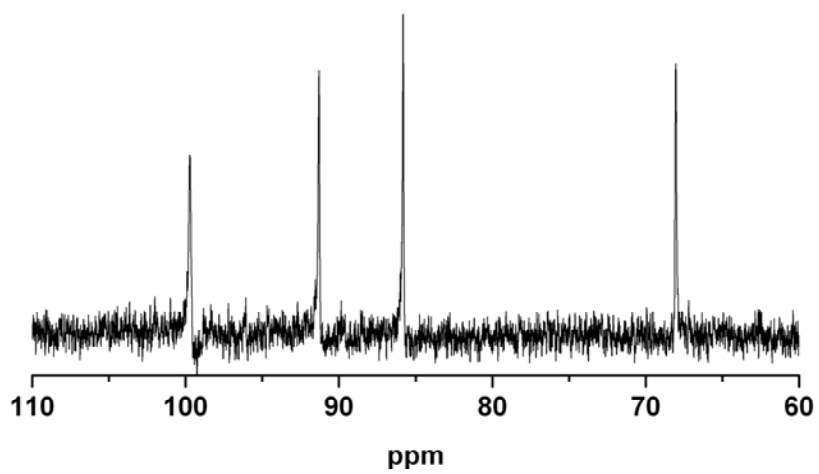

**Figure S9.**  $^{31}\text{P}$  NMR (242 MHz,  $\text{CD}_2\text{Cl}_2$ ) spectrum of  $[\mathbf{1}(t\text{-H})]\text{BAr}^{\text{F}}_4$  generated by protonation of  $\mathbf{1}$  with  $[\text{H}(\text{Et}_2\text{O})_2]\text{BAr}^{\text{F}}_4$  at  $-80\text{ }^\circ\text{C}$ .

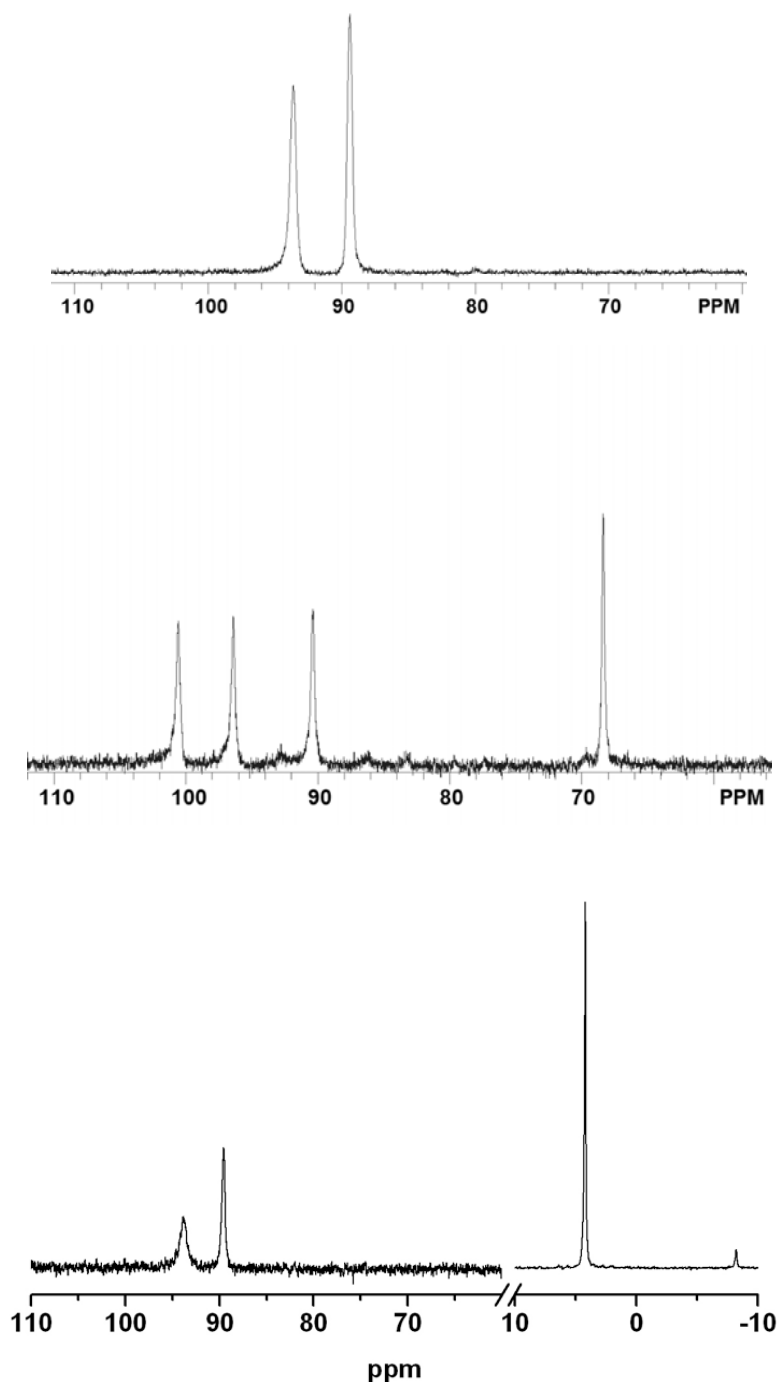

**Figure S10.**  $^{31}\text{P}\{^1\text{H}\}$  NMR (242 MHz,  $\text{CD}_2\text{Cl}_2$ ) spectra of **3** ( $-90^\circ\text{C}$ ) before (top) and after ( $-90^\circ\text{C}$ , middle) treatment with 1 equiv of  $[\text{H}(\text{Et}_2\text{O})_2]\text{BAr}^{\text{F}}_4$ , showing complete conversion to  $[\mathbf{3}(t\text{-H})]\text{BAr}^{\text{F}}_4$ . Bottom: Reaction of **3** ( $-80^\circ\text{C}$ ,  $\text{CD}_2\text{Cl}_2$ ) with  $\sim 1.2$  equiv  $[\text{HPPh}_3]\text{BF}_4$ , showing mostly unreacted **3** (the right spectrum shows the signals for  $\text{HPPh}_3^+$  as well as trace  $\text{PPh}_3$ ). The low field signal is slightly broadened due to the onset of decoalescence.

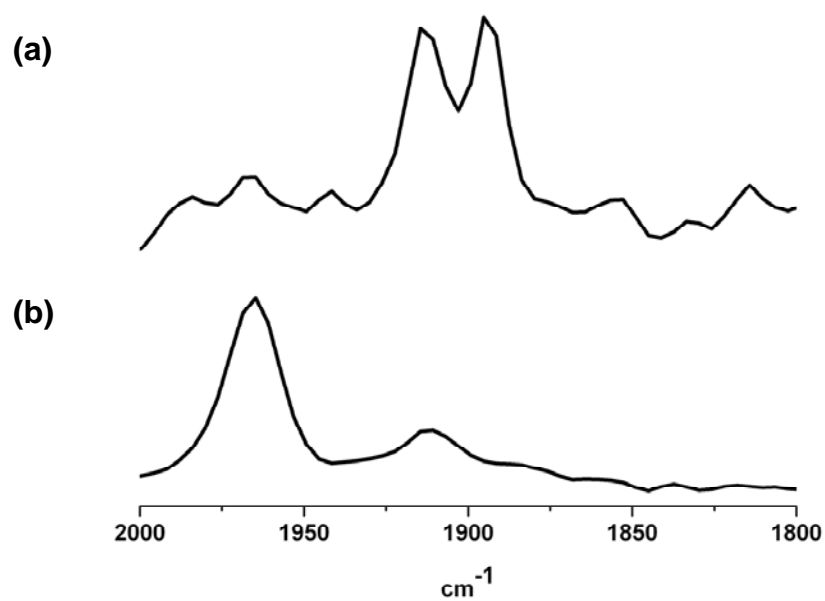

**Figure S11.** *In situ* ReactIR spectra of  $[\mathbf{2H}]\text{BArF}_4$  in MeOH (**a**,  $-40\text{ }^\circ\text{C}$ , rough baseline arises in MeOH soln) showing *N*-protonated tautomer ( $1910, 1890\text{ cm}^{-1}$ ) and in  $\text{CH}_2\text{Cl}_2$  (**b**,  $-40\text{ }^\circ\text{C}$ ) showing terminal hydride tautomer ( $1965, 1910\text{ cm}^{-1}$ ).

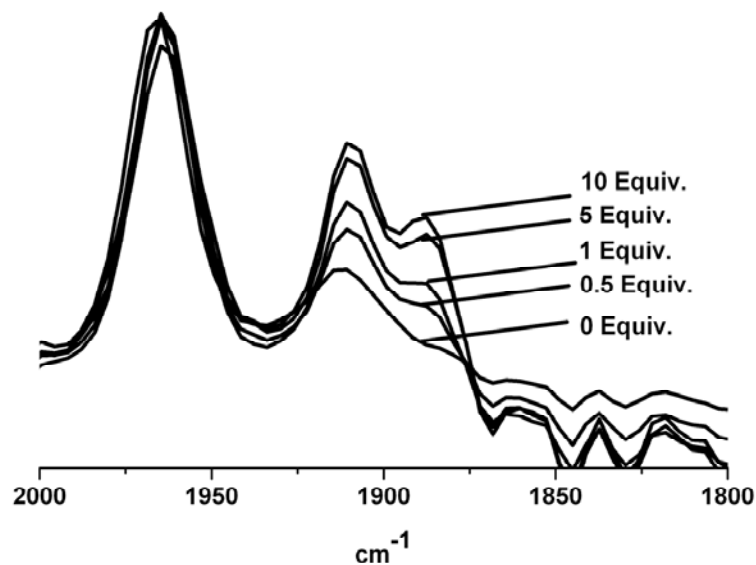

**Figure S12.** *In situ* ReactIR spectra of  $[2\text{H}]\text{BArF}_4$  ( $\text{CD}_2\text{Cl}_2$  solution) showing terminal hydride tautomer at  $-40\text{ }^\circ\text{C}$  ( $1965, 1910\text{ cm}^{-1}$ ) titrated with increasing equivs of  $[\text{NBu}_4]\text{BF}_4$ . The growth of the ammonium tautomer ( $1965, 1910\text{ cm}^{-1}$ ) upon addition of  $\text{BF}_4^-$  is consistent with similar  $\text{p}K_{\text{a}}$ 's of the ammonium and the terminal hydride tautomers. The spectra are normalized with respect to the band near  $1970\text{ cm}^{-1}$ .

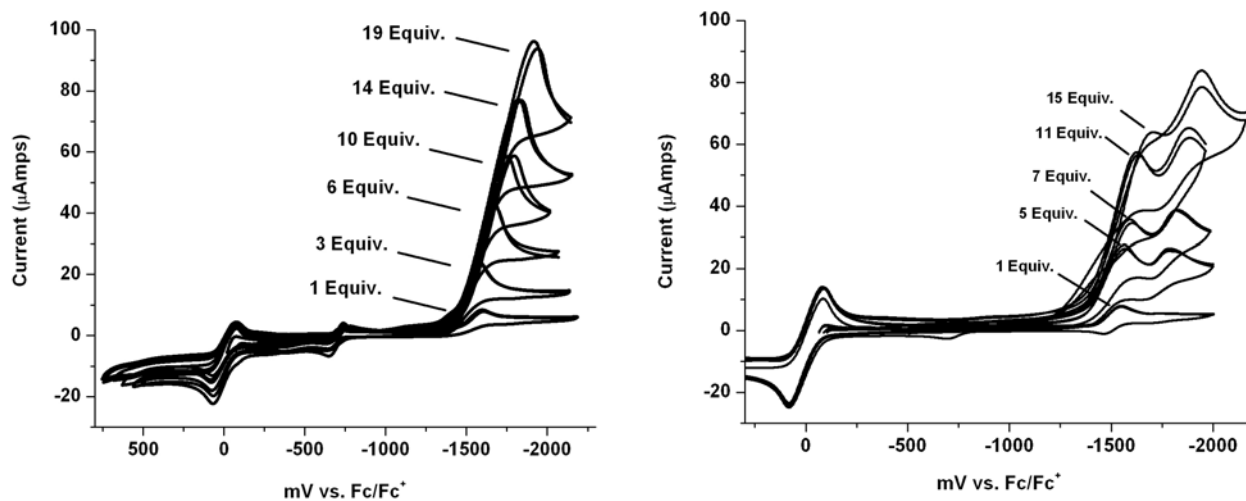

**Figure S13.** Cyclic voltammograms for  $[2(t-H)]BF_4$  (left) and  $[3(t-H)]BF_4$  (right) (-20 °C, 1 mM catalyst, ~1 mM ferrocene) with increasing amounts of  $[HPMe_2Ph]BF_4$  and  $HBF_4 \cdot Et_2O$ , respectively. The presence of unprotonated **2** and **3** is seen at ~-200 mV. The event at ~-2 V for  $[3(t-H)]BF_4$  is attributed to catalysis by  $[3(\mu-H)]BF_4$ .



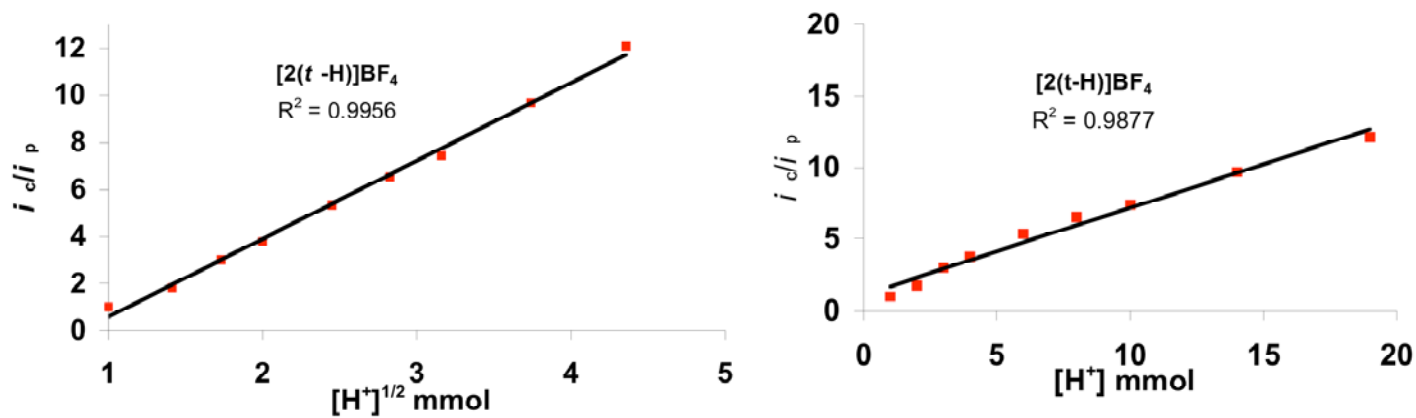

**Figure S14.** Plot of  $[H^+]^{1/2}$  (left) and  $[H^+]$  (right) vs. current ( $i_c/i_p$ ) for  $[2(t-H)]BF_4$  (-20 °C, 1 mM catalyst,  $[HPMe_2Ph]BF_4$ ).  $i_c$  is the peak catalytic current,  $i_p$  is the peak current in the absence of acid.

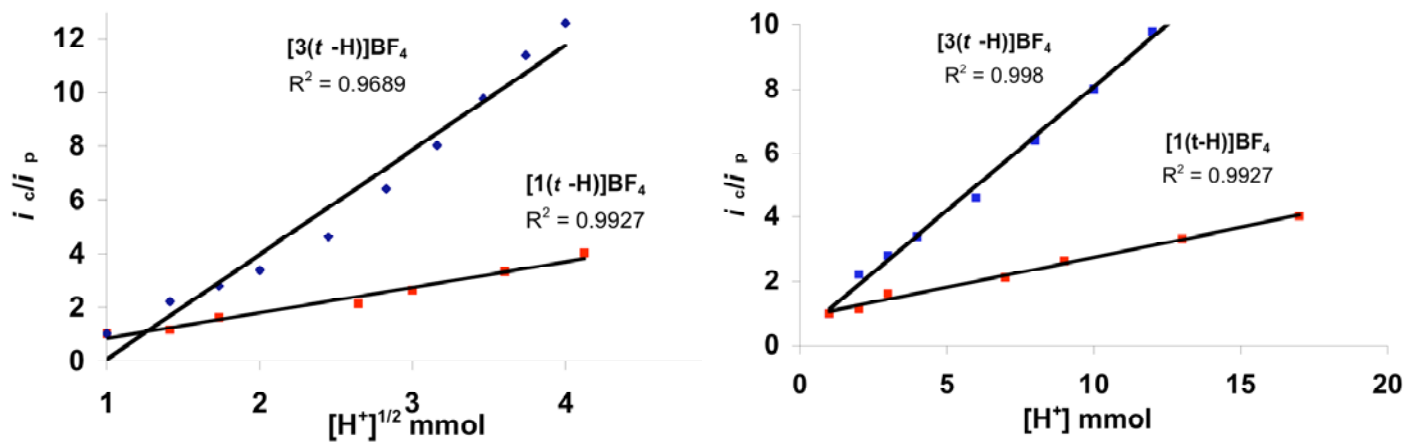

**Figure S15.** Plots of  $[H^+]^{1/2}$  (left) and  $[H^+]$  (right) vs. current ( $i_c/i_p$ ) for **[1(t-H)]BF<sub>4</sub>** and **[3(t-H)]BF<sub>4</sub>** (-20 °C, 1 mM catalyst, HBF<sub>4</sub>·Et<sub>2</sub>O).

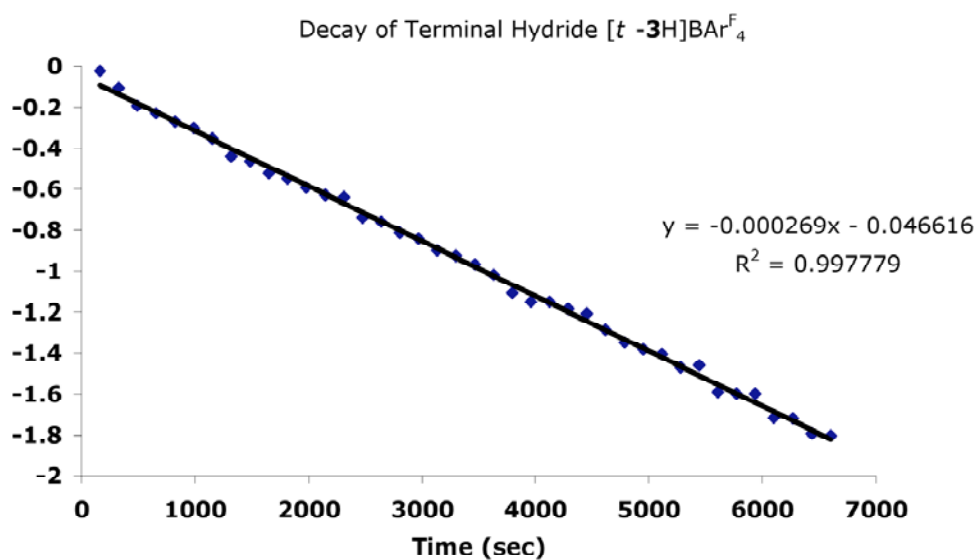

**Figure S16.** Plot of decay of terminal hydride [ $\mathbf{3}(t\text{-H})$ ] $\text{BAr}^{\text{F}}_4$  ( $-10\text{ }^\circ\text{C}$ ,  $\text{CH}_2\text{Cl}_2$ , soln.) as assayed by  $^1\text{H}$  NMR spectra. The products are isomers of [ $\mathbf{3}(\mu\text{-H})$ ] $\text{BAr}^{\text{F}}_4$ . Scale on left shows  $\ln(\text{signal intensity})$  in arbitrary units.

**3) Supporting References**

1. Barton, B. E.; Rauchfuss, T. B. *Inorg. Chem.* **2008**, *47*, 2261-2263.
2. Song, L.-C.; Yang, Z.-Y; Bian, H.-Z.; Hu, Q.-M. *Organometallics.* **2004**, *23*, 3082-3084.
3. Yakelis, N. A.; Bergman, R. G. *Organometallics.* **2005**, 3579-3581.
